# Supplementary material for: Multimodal assessment of non-alcoholic fatty liver disease with transmission-reflection optoacoustic ultrasound
Source: PubMed Central journal article supplement (PMC10405839; doi:10.7150/thno.78548), 2023-07-24
Supplement: thnov13p4217s1.pdf [file thnov13p4217s1.pdf]

**SUPPLEMENTARY MATERIALS FOR:**

**Multimodal assessment of non-alcoholic fatty liver disease with  
transmission-reflection optoacoustic ultrasound**

Berkan Lafci<sup>1,2</sup>, Anna Hadjihambi<sup>3,4,5</sup>, Madita Determann<sup>6</sup>, Christos Konstantinou<sup>3,4,5</sup>, Clara Freijo<sup>7</sup>,  
Joaquin L. Herraiz<sup>7,8</sup>, Sena Blümel<sup>6</sup>, Luc Pellerin<sup>5,9</sup>, Neal C. Burton<sup>10</sup>, Xosé Luís Deán-Ben<sup>1,2</sup>, and  
Daniel Razansky<sup>1,2,\*</sup>

<sup>1</sup> Institute of Pharmacology and Toxicology and Institute for Biomedical Engineering, Faculty of Medicine, University of Zurich, Switzerland

<sup>2</sup> Institute for Biomedical Engineering, Department of Information Technology and Electrical Engineering, ETH Zurich, Switzerland

<sup>3</sup> The Roger Williams Institute of Hepatology, Foundation for Liver Research, London, UK

<sup>4</sup> Faculty of Life Sciences and Medicine, King's College London

<sup>5</sup> Department of Biomedical Sciences, University of Lausanne, Lausanne, Switzerland

<sup>6</sup> Department of Gastroenterology and Hepatology, University Hospital Zurich, Zurich, Switzerland

<sup>7</sup> Nuclear Physics Group and IPARCOS, Complutense University of Madrid, Madrid, Spain

<sup>8</sup> Health Research Institute of Hospital Clínico San Carlos (IdISSC), Madrid, Spain

<sup>9</sup> Inserm U1313, Université et CHU de Poitiers, Poitiers, France

<sup>10</sup> iThera Medical GmbH, Munich, Germany

\* Email: daniel.razansky@uzh.ch

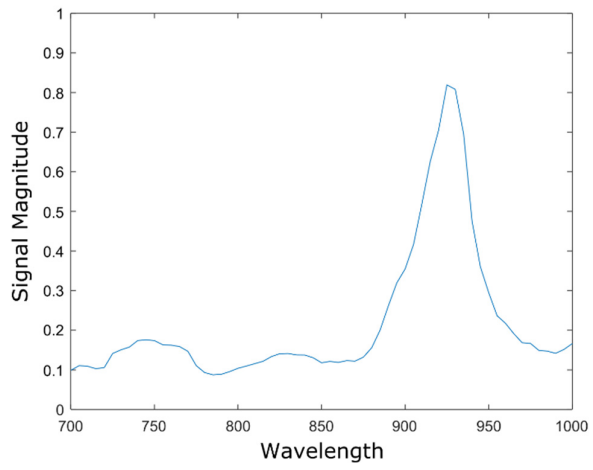

**Figure S1: MSOT imaging of an excised fat tissue.** Measured spectrum of excised fat tissue between 700 nm and 1000 nm excitation wavelengths.

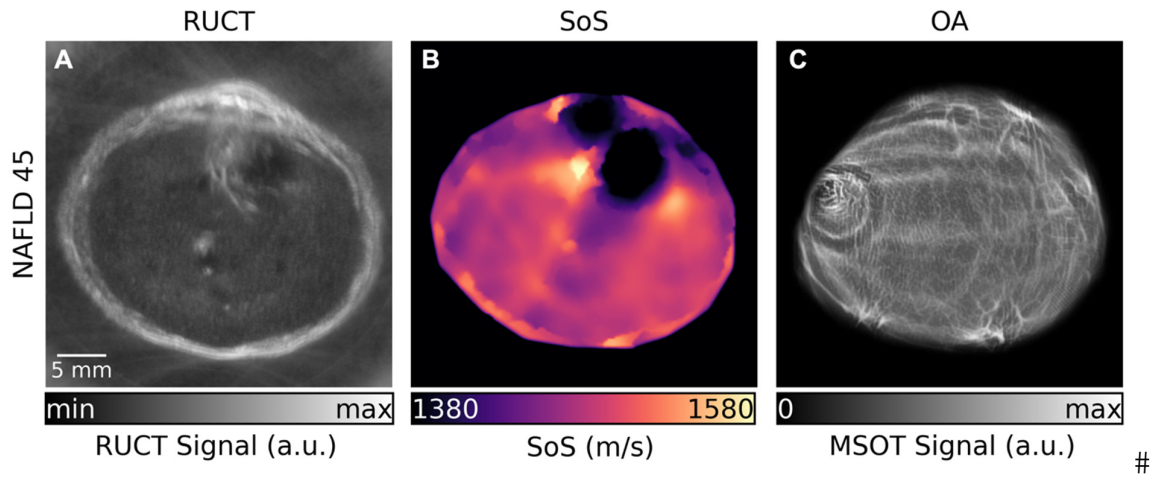

**Figure S2: *In vivo* TROPUS images from 45 weeks old NAFLD mice. (A) RUCT image. (B) SoS image. (C) MSOT image. RUCT: reflection ultrasound computed tomography; SoS: speed of sound; MSOT: multispectral optoacoustic tomography.**

#

#
